# Supplementary material for: 20 years of herpes simplex virus type 2 (HSV-2) research in low-income and middle-income countries: systematic evaluation of progress made in addressing WHO priorities for research in HSV-2/HIV interactions, HSV-2 control and mathematical modelling
Source: PubMed Central journal article supplement (PMC11227757; doi:10.1136/bmjgh-2024-015167), 2024-07-04
Supplement: bmjgh-2024-015167supp001.pdf [file bmjgh-2024-015167supp001.pdf]

## Appendix 1 – Search strategy (MEDLINE, CINAHL, Global Health, Cochrane)

## Objective 1- HSV-2 control measures

| Database: MEDLINE         |                                                                                                                                                                                                                                                                                                                                                                                                                                                                                                     |                   |
|---------------------------|-----------------------------------------------------------------------------------------------------------------------------------------------------------------------------------------------------------------------------------------------------------------------------------------------------------------------------------------------------------------------------------------------------------------------------------------------------------------------------------------------------|-------------------|
| Date searched: 01/08/2020 |                                                                                                                                                                                                                                                                                                                                                                                                                                                                                                     |                   |
| Search number             | Search terms                                                                                                                                                                                                                                                                                                                                                                                                                                                                                        | Number of results |
| S10                       | S3 AND S6 AND S9                                                                                                                                                                                                                                                                                                                                                                                                                                                                                    | 211               |
| S9                        | S7 OR S8                                                                                                                                                                                                                                                                                                                                                                                                                                                                                            | 289,280           |
| S8                        | (MH "Developing Countries")                                                                                                                                                                                                                                                                                                                                                                                                                                                                         | 74,612            |
| S7                        | "developing countr*" OR "low income countr*" OR LIC OR LMIC OR "low to middle income countr*" OR "low-to-middle income countr*" OR "low-tomiddle income" OR "low to middle income" OR "low income" OR "middle income" OR "least developed countr*" OR "less developed countr*" OR "under developed countr*" OR "under developed nation*" OR "poor countr*" OR "third world countr*" OR "third world nation*" OR "least developed nation*" OR "less developed nation*" OR "global south" OR "sub-Sah | 289,280           |
| S6                        | S4 OR S5                                                                                                                                                                                                                                                                                                                                                                                                                                                                                            | 2,412,767         |
| S5                        | (MH "Primary Prevention+") OR (MH "Secondary Prevention") OR (MH "Tertiary Prevention") OR (MH "Vaccines+") OR (MH "Case Management")OR (MH "Antiviral Agents+") OR (MH "Acyclovir+") OR (MH "Condoms")                                                                                                                                                                                                                                                                                             | 490,269           |
| S4                        | "control measure" OR "preventive measure" OR "intervention" OR "benefit" OR "protection genital herpes" OR "condom" OR "vaccine" OR "case management" OR "Episodic therapy" OR "suppressive therapy" OR "Antiviral drugs" OR "Aciclovir*" OR "acyclovir resistance" OR "resistance" OR "behavioural interventions" OR "suppressive"                                                                                                                                                                 | 2,203,422         |
| S3                        | S1 OR S2                                                                                                                                                                                                                                                                                                                                                                                                                                                                                            | 81,850            |
| S2                        | (MH "Herpes Genitalis") OR (MH "Herpesvirus 2, Human") OR (MH "Herpes Simplex+") OR (MH "Herpes Labialis")                                                                                                                                                                                                                                                                                                                                                                                          | 25,607            |

|    |                                                                                                                                    |        |
|----|------------------------------------------------------------------------------------------------------------------------------------|--------|
| S1 | "HSV-2" OR "genital herpes" OR "herpes" OR "herpes genitalis" OR "herpes simplex 2" OR "human simplex virus 2" OR "herpes virus 2" | 79,564 |
|----|------------------------------------------------------------------------------------------------------------------------------------|--------|

| Database: CINAHL          |                                                                                                                                                                                                                                                                                                                                                                                                                                                                                                                                               |                   |
|---------------------------|-----------------------------------------------------------------------------------------------------------------------------------------------------------------------------------------------------------------------------------------------------------------------------------------------------------------------------------------------------------------------------------------------------------------------------------------------------------------------------------------------------------------------------------------------|-------------------|
| Date searched: 01/08/2020 |                                                                                                                                                                                                                                                                                                                                                                                                                                                                                                                                               |                   |
| Search number             | Search terms                                                                                                                                                                                                                                                                                                                                                                                                                                                                                                                                  | Number of results |
| S10                       | S3 AND S6 AND S9                                                                                                                                                                                                                                                                                                                                                                                                                                                                                                                              | 82                |
| S9                        | S7 OR S8                                                                                                                                                                                                                                                                                                                                                                                                                                                                                                                                      | 82,345            |
| S8                        | (MH "Developing Countries")                                                                                                                                                                                                                                                                                                                                                                                                                                                                                                                   | 19,539            |
| S7                        | "developing countr*" OR "low income countr*" OR LIC OR LMIC OR "low to middle income countr*" OR "low-to-middle income countr*" OR "low-tomiddle income" OR "low to middle income" OR "low income" OR "middle income" OR "least developed countr*" OR "less developed countr*" OR "under developed countr*" OR "under developed nation*" OR "poor countr*" OR "third world countr*" OR "third world nation*" OR "least developed nation*" OR "less developed nation*" OR "global south" OR "sub-Sahharan Africa" OR "Asia" OR "South America" | 82,345            |
| S6                        | S4 OR S5                                                                                                                                                                                                                                                                                                                                                                                                                                                                                                                                      | 676,146           |
| S5                        | (MH "Preventive") OR (MH "Vaccines+") OR (MH "Case Management") OR (MH "Antiviral Agents+") OR (MH "Acyclovir+") OR (MH "Condoms+")                                                                                                                                                                                                                                                                                                                                                                                                           | 122,709           |
| S4                        | "control measure" OR "preventive measure" OR "intervention" OR "benefit" OR "protection genital herpes" OR "condom" OR "vaccine" OR "case management" OR "Episodic therapy" OR "suppressive therapy" OR "Antiviral drugs" OR "Aciclovir*" OR "acyclovir resistance" OR "resistance" OR "behavioural interventions" OR "suppressive"                                                                                                                                                                                                           | 636,087           |
| S3                        | S1 OR S2                                                                                                                                                                                                                                                                                                                                                                                                                                                                                                                                      | 15,035            |
| S2                        | (MH "Herpesviruses+") OR (MH "Herpes Genitalis")                                                                                                                                                                                                                                                                                                                                                                                                                                                                                              | 7,177             |

|    |                                                                                                                                    |        |
|----|------------------------------------------------------------------------------------------------------------------------------------|--------|
| S1 | "HSV-2" OR "genital herpes" OR "herpes" OR "herpes genitalis" OR "herpes simplex 2" OR "human simplex virus 2" OR "herpes virus 2" | 11,345 |
|----|------------------------------------------------------------------------------------------------------------------------------------|--------|

| Database: Global Health   |                                                                                                                                                                                                                                                                                                                                                                                                                                                                                                                                               |                   |
|---------------------------|-----------------------------------------------------------------------------------------------------------------------------------------------------------------------------------------------------------------------------------------------------------------------------------------------------------------------------------------------------------------------------------------------------------------------------------------------------------------------------------------------------------------------------------------------|-------------------|
| Date searched: 01/08/2020 |                                                                                                                                                                                                                                                                                                                                                                                                                                                                                                                                               |                   |
| Search number             | Search terms                                                                                                                                                                                                                                                                                                                                                                                                                                                                                                                                  | Number of results |
| S10                       | S3 AND S6 AND S9                                                                                                                                                                                                                                                                                                                                                                                                                                                                                                                              | 623               |
| S9                        | S7 OR S8                                                                                                                                                                                                                                                                                                                                                                                                                                                                                                                                      | 855,928           |
| S8                        | DE "Developing Countries" OR DE "Least Developed Countries"                                                                                                                                                                                                                                                                                                                                                                                                                                                                                   | 843,726           |
| S7                        | "developing countr*" OR "low income countr*" OR LIC OR LMIC OR "low to middle income countr*" OR "low-to-middle income countr*" OR "low-tomiddle income" OR "low to middle income" OR "low income" OR "middle income" OR "least developed countr*" OR "less developed countr*" OR "under developed countr*" OR "under developed nation*" OR "poor countr*" OR "third world countr*" OR "third world nation*" OR "least developed nation*" OR "less developed nation*" OR "global south" OR "sub-Sahharan Africa" OR "Asia" OR "South America" | 855,682           |
| S6                        | S4 OR S5                                                                                                                                                                                                                                                                                                                                                                                                                                                                                                                                      | 582,283           |
| S5                        | DE "prevention" OR "vaccines" OR DE "antiviral agents" OR DE "condoms"                                                                                                                                                                                                                                                                                                                                                                                                                                                                        | 157,308           |
| S4                        | "control measure" OR "preventive measure" OR "intervention" OR "benefit" OR "protection genital herpes" OR "condom" OR "vaccine" OR "case management" OR "Episodic therapy" OR "suppressive therapy" OR "Antiviral drugs" OR "Aciclovir*" OR "acyclovir resistance" OR "resistance" OR "behavioural interventions" OR "suppressive"                                                                                                                                                                                                           | 513,792           |
| S3                        | S1 OR S2                                                                                                                                                                                                                                                                                                                                                                                                                                                                                                                                      | 14,030            |
| S2                        | DE "Human herpesvirus 2" OR DE "herpes simplex viruses"                                                                                                                                                                                                                                                                                                                                                                                                                                                                                       | 7,710             |
| S1                        | "HSV-2" OR "genital herpes" OR "herpes" OR "herpes genitalis" OR "herpes simplex 2" OR "human simplex virus 2" OR "herpes virus 2"                                                                                                                                                                                                                                                                                                                                                                                                            | 13,869            |



| Database: CINAHL          |                                                                                                                                                                                                                                                                                                                                                                                                                                                                                                                 |                   |
|---------------------------|-----------------------------------------------------------------------------------------------------------------------------------------------------------------------------------------------------------------------------------------------------------------------------------------------------------------------------------------------------------------------------------------------------------------------------------------------------------------------------------------------------------------|-------------------|
| Date searched: 01/08/2020 |                                                                                                                                                                                                                                                                                                                                                                                                                                                                                                                 |                   |
| Search number             | Search terms                                                                                                                                                                                                                                                                                                                                                                                                                                                                                                    | Number of results |
| S6                        | Limiters- full text only                                                                                                                                                                                                                                                                                                                                                                                                                                                                                        | 109               |
| S5                        | Limiters- English only, post year 2000                                                                                                                                                                                                                                                                                                                                                                                                                                                                          | 116               |
| S4                        | S1 AND S2 AND S3                                                                                                                                                                                                                                                                                                                                                                                                                                                                                                | 125               |
| S3                        | (MH "diagnosis") OR (MH "polymerase chain reaction") OR (MH "laboratory diagnosis") OR diagnos* OR "diagnostic test*" OR test* OR "rapid diagnostic test*" OR "rapid test*" OR "point of care test*" OR NAAT OR "Nucleic Acid Amplification Test" OR PCR OR "Polymerase chain reaction" OR immunoassay OR culture OR serolog* OR antibod*                                                                                                                                                                       | 2,179,651         |
| S2                        | (MH "developing countries") OR (MH "low and middle income countries") OR "developing countr*" OR LMIC OR "low-to-middle income" OR "low to middle income" OR "low income" OR "middle income" OR "East developed countr*" OR "less developed countr*" OR "under developed countr*" OR "under developed nation*" OR "poor countr*" OR "third world countr*" OR "third world nation*" OR "East developed nation*" OR "less developed nation*" OR "global South" OR "sub-Saharan Africa" OR Asia OR "South America" | 82,099            |
| S1                        | (MH "herpesviruses") OR (MH "Herpes Genitalis") OR (MH "herpes simplex") OR "herpes virus 2" OR "human simplex virus 2" OR "herpes simplex 2" OR "herpes genitalis" OR herpes OR "genital herpes" OR HSV-2                                                                                                                                                                                                                                                                                                      | 12,567            |

| Database: Global Health   |                                                                                                                                                                                                                                                                                                                                                                                                                                                                                                                                   |                   |
|---------------------------|-----------------------------------------------------------------------------------------------------------------------------------------------------------------------------------------------------------------------------------------------------------------------------------------------------------------------------------------------------------------------------------------------------------------------------------------------------------------------------------------------------------------------------------|-------------------|
| Date searched: 01/08/2020 |                                                                                                                                                                                                                                                                                                                                                                                                                                                                                                                                   |                   |
| Search number             | Search terms                                                                                                                                                                                                                                                                                                                                                                                                                                                                                                                      | Number of results |
| S6                        | Limiters- full text only                                                                                                                                                                                                                                                                                                                                                                                                                                                                                                          | 1,167             |
| S5                        | Limiters- English only, post year 2000                                                                                                                                                                                                                                                                                                                                                                                                                                                                                            | 2,047             |
| S4                        | S1 AND S2 AND S3                                                                                                                                                                                                                                                                                                                                                                                                                                                                                                                  | 2,350             |
| S3                        | (DE "diagnosis") OR (DE "laboratory diagnosis") OR (DE "immunodiagnosis") OR diagnos* OR "diagnostic test*" OR test* OR "rapid diagnostic test*" OR "rapid test*" OR "point of care test*" OR NAAT OR "Nucleic Acid Amplification Test" OR PCR OR "Polymerase chain reaction" OR immunoassay OR culture OR serolog* OR antibod*                                                                                                                                                                                                   | 1,100,893         |
| S2                        | (DE "developing countries") OR (DE "East developed countries") OR (DE "SADC Countries") OR "developing countr*" OR LMIC OR "low-to-middle income" OR "low to middle income" OR "low income" OR "middle income" OR "East developed countr*" OR "less developed countr*" OR "under developed countr*" OR "under developed nation*" OR "poor countr*" OR "third world countr*" OR "third world nation*" OR "East developed nation*" OR "less developed nation*" OR "global South" OR "sub-Saharan Africa" OR Asia OR "South America" | 969,847           |
| S1                        | (DE "human herpesvirus 2") OR (DE "Herpes Simplex Viruses") OR "herpes virus 2" OR "human simplex virus 2" OR "herpes simplex 2" OR "herpes genitalis" OR herpes OR "genital herpes" OR HSV-2                                                                                                                                                                                                                                                                                                                                     | 13,918            |

| Database: Cochrane Library |                                                                                                                                                                                                                                                                                                                                                                      |                   |
|----------------------------|----------------------------------------------------------------------------------------------------------------------------------------------------------------------------------------------------------------------------------------------------------------------------------------------------------------------------------------------------------------------|-------------------|
| Date searched: 01/08/2020  |                                                                                                                                                                                                                                                                                                                                                                      |                   |
| Search number              | Search terms                                                                                                                                                                                                                                                                                                                                                         | Number of results |
| S6                         | Limiters- full text only                                                                                                                                                                                                                                                                                                                                             | 7                 |
| S5                         | Limiters- English only, post year 2000                                                                                                                                                                                                                                                                                                                               | 7                 |
| S4                         | S1 AND S2 AND S3                                                                                                                                                                                                                                                                                                                                                     | 7                 |
| S3                         | (MH "diagnosis") OR diagnos* OR "diagnostic test*" OR test* OR "rapid diagnostic test*" OR "rapid test*" OR "point of care test*" OR NAAT OR "Nucleic Acid Amplification Test" OR PCR OR "Polymerase chain reaction" OR immunoassay OR culture OR                                                                                                                    | 437,893           |
| Database: MEDLINE          |                                                                                                                                                                                                                                                                                                                                                                      |                   |
| S2                         | serolog* OR antibod*                                                                                                                                                                                                                                                                                                                                                 |                   |
| Date searched: 02/08/2020  |                                                                                                                                                                                                                                                                                                                                                                      |                   |
| Search number              | Search terms                                                                                                                                                                                                                                                                                                                                                         | Number of results |
| S6                         | (MH "developing countries") OR "developing countr*" OR LMIC OR                                                                                                                                                                                                                                                                                                       | 6,192             |
| S6                         | Limiters- full text only                                                                                                                                                                                                                                                                                                                                             | 129               |
| S5                         | "low-to-middle income" OR "low to middle income" OR "low income"                                                                                                                                                                                                                                                                                                     | 130               |
| S5                         | Limiters- English only, post year 2000                                                                                                                                                                                                                                                                                                                               | 130               |
| S4                         | S1 AND S2 AND S3                                                                                                                                                                                                                                                                                                                                                     | 172               |
| S3                         | OR "middle income" OR "East (MH "biological models") OR (MH "statistical models") OR (MH "developmental models") OR "under developed countri*" OR "under developed countries" OR "under developed nation*" OR "developing nation*" OR "statistical model*" OR "vaccine model*" OR "predict*" OR "third world nation*" OR "East                                       | 4,951,333         |
| S2                         | (MH "developing countries") OR "developed nation" OR "less developed nation*" OR LMIC OR "developed nation*" OR "global South" OR "sub-Saharan Africa" OR "low-to-middle income" OR "low to middle income" OR "low income" OR OR Asia OR "South America" OR "middle income" OR "East developed                                                                       | 288,482           |
| S1                         | (MH "human herpes virus 2") OR countri* OR "less developed countri*" OR "under developed countri*" OR "single developed countri*" OR "poor countri*" OR "third world countri*" OR "herpes" OR "genital herpes" OR "third world nation*" OR "East developed nation*" OR "less developed nation*" OR "global South" OR "sub-Saharan Africa" OR Asia OR "South America" | 4,288             |

Objective 3 – HSV-2 mathematical modelling

|    |                                                                                                                                                                                                                                              |        |
|----|----------------------------------------------------------------------------------------------------------------------------------------------------------------------------------------------------------------------------------------------|--------|
| S1 | (MH "Herpes Simplex+") OR (MH "Herpes Labialis") OR (MH "Herpes Genitalis") OR (MH "Herpesvirus 2, Human") OR "herpes virus 2" OR "human simplex virus 2" OR "herpes simplex 2" OR "herpes genitalis" OR herpes OR "genital herpes" OR HSV-2 | 81,907 |
|----|----------------------------------------------------------------------------------------------------------------------------------------------------------------------------------------------------------------------------------------------|--------|



| <b>Database: CINAHL</b>          |                                                                                                                                                                                                                                                                                                                                                                                                                                                                                                                 |                          |
|----------------------------------|-----------------------------------------------------------------------------------------------------------------------------------------------------------------------------------------------------------------------------------------------------------------------------------------------------------------------------------------------------------------------------------------------------------------------------------------------------------------------------------------------------------------|--------------------------|
| <b>Date searched: 02/08/2020</b> |                                                                                                                                                                                                                                                                                                                                                                                                                                                                                                                 |                          |
| <b>Search number</b>             | <b>Search terms</b>                                                                                                                                                                                                                                                                                                                                                                                                                                                                                             | <b>Number of results</b> |
| S6                               | Limiters- full text only                                                                                                                                                                                                                                                                                                                                                                                                                                                                                        | 27                       |
| S5                               | Limiters- English only, post year 2000                                                                                                                                                                                                                                                                                                                                                                                                                                                                          | 29                       |
| S4                               | S1 AND S2 AND S3                                                                                                                                                                                                                                                                                                                                                                                                                                                                                                | 30                       |
| S3                               | (MH "biological models") OR (MG "statistical models") OR "mathematical model*" OR model* OR "disease model*" OR "statistical model*" OR "vaccin* model*" OR predict*                                                                                                                                                                                                                                                                                                                                            | 946,209                  |
| S2                               | (MH "developing countries") OR (MH "low and middle income countries") OR "developing countr*" OR LMIC OR "low-to-middle income" OR "low to middle income" OR "low income" OR "middle income" OR "East developed countr*" OR "less developed countr*" OR "under developed countr*" OR "under developed nation*" OR "poor countr*" OR "third world countr*" OR "third world nation*" OR "East developed nation*" OR "less developed nation*" OR "global South" OR "sub-Saharan Africa" OR Asia OR "South America" | 82,099                   |
| S1                               | (MH "herpesviruses") OR (MH "Herpes Genitalis") OR (MH "herpes simplex") OR "herpes virus 2" OR "human simplex virus 2" OR "herpes simplex 2" OR "herpes genitalis" OR herpes OR "genital herpes" OR HSV-2                                                                                                                                                                                                                                                                                                      | 12,567                   |

| Database: Global Health   |                                                                                                                                                                                                                                                                                                                                                                                                                                                                                                                                                                               |                   |
|---------------------------|-------------------------------------------------------------------------------------------------------------------------------------------------------------------------------------------------------------------------------------------------------------------------------------------------------------------------------------------------------------------------------------------------------------------------------------------------------------------------------------------------------------------------------------------------------------------------------|-------------------|
| Date searched: 02/08/2020 |                                                                                                                                                                                                                                                                                                                                                                                                                                                                                                                                                                               |                   |
| Search number             | Search terms                                                                                                                                                                                                                                                                                                                                                                                                                                                                                                                                                                  | Number of results |
| S6                        | Limiters- full text only                                                                                                                                                                                                                                                                                                                                                                                                                                                                                                                                                      | 495               |
| S5                        | Limiters- English only, post year 2000                                                                                                                                                                                                                                                                                                                                                                                                                                                                                                                                        | 495               |
| S4                        | S1 AND S2 AND S3                                                                                                                                                                                                                                                                                                                                                                                                                                                                                                                                                              | 523               |
| S3                        | (DE "mathematical models") OR<br>d"mathematical model*" OR model*<br>OR "disease model*" OR "statistical<br>model*" OR "vaccin* model*" OR<br>predict*                                                                                                                                                                                                                                                                                                                                                                                                                        | 814,970           |
| S2                        | (DE "developing countries") OR (DE<br>"IEast developed countries") OR (DE<br>"SADC Countries") OR "developing<br>countr*" OR LMIC OR "low-to-middle<br>income" OR "low to middle income"<br>OR "low income" OR "middle<br>income"OR "IEast developed countr*"<br>OR "less developed countr*" OR<br>"under developed countr*" OR "under<br>developed nation*" OR "poor countr*"<br>OR "third world countr*" OR "third<br>world nation*" OR "IEast developed<br>nation*" OR "less developed nation*"<br>OR "global South" OR "sub-Saharan<br>Africa" OR Asia OR "South America" | 969,847           |
| S1                        | (DE "human herpesvirus 2") OR<br>(DE "Herpes Simplex Viruses") OR<br>"herpes virus 2" OR "human simplex<br>virus 2" OR "herpes simplex 2" OR<br>"herpes genitalis" OR herpes OR<br>"genital herpes" OR HSV-2                                                                                                                                                                                                                                                                                                                                                                  | 13,918            |

| Database: Cochrane Library |                                                                                                                                                                                                                                                                                                                                                                                                                                                                       |                   |
|----------------------------|-----------------------------------------------------------------------------------------------------------------------------------------------------------------------------------------------------------------------------------------------------------------------------------------------------------------------------------------------------------------------------------------------------------------------------------------------------------------------|-------------------|
| Date searched: 02/08/2020  |                                                                                                                                                                                                                                                                                                                                                                                                                                                                       |                   |
| Search number              | Search terms                                                                                                                                                                                                                                                                                                                                                                                                                                                          | Number of results |
| S6                         | Limiters- full text only                                                                                                                                                                                                                                                                                                                                                                                                                                              | 2                 |
| S5                         | Limiters- English only, post year 2000                                                                                                                                                                                                                                                                                                                                                                                                                                | 2                 |
| S4                         | S1 AND S2 AND S3                                                                                                                                                                                                                                                                                                                                                                                                                                                      | 2                 |
| S3                         | (MH "biological models") OR (MG "statistical models") OR "mathematical model*" OR model* OR "disease model*" OR "statistical model*" OR "vaccin* model*" OR predict*                                                                                                                                                                                                                                                                                                  | 112,680           |
| S2                         | (MH "developing countries") OR "developing countr*" OR LMIC OR "low-to-middle income" OR "low to middle income" OR "low income" OR "middle income" OR "East developed countr*" OR "less developed countr*" OR "under developed countr*" OR "under developed nation*" OR "poor countr*" OR "third world countr*" OR "third world nation*" OR "East developed nation*" OR "less developed nation*" OR "global South" OR "sub-Saharan Africa" OR Asia OR "South America" | 6,192             |
| S1                         | (MH "human herpes virus 2") OR "herpes virus 2" OR "human simplex virus 2" OR "herpes simplex 2" OR "herpes genitalis" OR herpes OR "genital herpes" OR HSV-2                                                                                                                                                                                                                                                                                                         | 4,286             |
